# Supplementary material
Source: Research Square preprint supplement (doi:10.21203/rs.3.rs-8892829/v1)
Supplement: Supplementary file 1 [file 460295eaa06495d8c05377ea.xlsx]

## Sheet: Add2
Additional file 2. Logistic regression results for the relationship between antenatal corticosteroid and maternal adverse events
	Model1												Model２
	Listed adverse event*1				Heart failure				Pulmonary edema				Listed adverse event*1				Heart failure				Pulmonary edema
	odds ratio	95% CI*2		ｐ	odds ratio	95% CI*2		ｐ	odds ratio	95% CI*2		ｐ	odds ratio	95% CI*2		ｐ	odds ratio	95% CI*2		ｐ	odds ratio	95% CI*2		ｐ
		Lower	Upper			Lower	Upper			Lower	Upper			Lower	Upper			Lower	Upper			Lower	Upper
Antenatal corticosteroids administration	1.1736	1.04799	1.31427	0.00557838	1.54741	1.22086	1.9613	0.000364686	2.45268	1.82063	3.30414	1.03649e-05	1.13894	0.960004	1.35123	0.135728	1.30729	0.921809	1.85398	0.132782	1.91869	1.24793	2.94998	0.00298633
Ritodorine duration ref <= 2 days	0.887514	0.778445	1.01187	0.0744793	1.30099	1.01006	1.67573	0.0416039	1.40651	1.01034	1.95802	0.0432876	0.954332	0.795953	1.14422	0.61366	1.11297	0.790379	1.56723	0.539945	1.28401	0.862781	1.91089	0.217813
Magnesium sulfate hydrate	1.92358	1.72884	2.14025	6.44687e-34	1.672	1.32808	2.10498	0.000123973	2.40168	1.78444	3.23243	2.537e-08	1.85785	1.57737	2.18821	0.000123973	1.38441	1.00596	1.90522	0.0458845	2.53321	1.69357	3.78912	0.000123973
BMI ref,18.5-24.9 kg/m2				0.265513				0.00785866				0.249384				0.656182				0.514504				0.148595
<18.5 kg/m2	1.1302	0.913209	1.39875	0.260477	0.576644	0.30528	1.08923	0.0897768	1.18422	0.652086	2.1506	0.578608	1.18576	0.878076	1.60125	0.26629	0.747619	0.363035	1.53961	0.430022	1.21271	0.580279	2.5344	0.608089
>=25,<30 kg/m2	1.02459	0.906172	1.15848	0.69829	1.19224	0.925596	1.5357	0.1734	1.36411	0.996803	1.86675	0.052385	1.07421	0.886039	1.30235	0.466267	1.1915	0.825364	1.72007	0.349598	1.57742	1.05892	2.3498	0.0249935
>=30 kg/m2	1.19766	0.975387	1.47058	0.0850621	1.67896	1.15296	2.44494	0.00688844	1.27807	0.742979	2.19852	0.375344	1.05698	0.76839	1.45395	0.733408	1.28269	0.731824	2.2482	0.384565	0.945513	0.432279	2.0681	0.888419
Fiscal ref.2012				6.696e-05				0.119537				0.386027				0.074				0.327949				0.165775
2013	1.04582	0.820361	1.33324	0.717627	0.70289	0.398554	1.23962	0.223256	1.03881	0.505442	2.13501	0.917495	0.901371	0.581324	1.39762	0.642639	1.42391	0.504966	4.01516	0.50403	0.679586	0.214424	2.15385	0.511622
2014	0.815906	0.639622	1.04078	0.101386	0.826254	0.494766	1.37984	0.465738	0.877172	0.431033	1.78509	0.717721	0.736756	0.486285	1.11624	0.149528	1.09357	0.403069	2.967	0.860564	1.0551	0.412786	2.69688	0.91081
2015	1.0277	0.811419	1.30164	0.820688	0.872722	0.520447	1.46344	0.605732	1.1062	0.552935	2.21307	0.775433	1.28568	0.878313	1.882	0.196164	1.77985	0.693672	4.56681	0.230455	0.804561	0.289984	2.23225	0.676195
2016	1.26967	1.01022	1.59574	0.0406449	1.36857	0.85313	2.19544	0.193181	1.29936	0.665515	2.53689	0.443006	1.24527	0.849896	1.82457	0.260391	2.36336	0.960579	5.81471	0.0611504	1.50673	0.622718	3.64569	0.363186
2017	0.967533	0.757681	1.23551	0.791318	0.925639	0.55143	1.55379	0.769988	1.2018	0.608056	2.37529	0.596943	1.02537	0.687336	1.52964	0.902309	1.96313	0.77932	4.94517	0.152427	0.880822	0.332235	2.33524	0.798652
2018	1.00307	0.790388	1.27299	0.979862	0.939592	0.567786	1.55487	0.80843	1.27823	0.660629	2.4732	0.466044	1.0506	0.711406	1.55152	0.804016	1.08463	0.404359	2.90938	0.871793	1.49882	0.623237	3.60449	0.366064
2019	0.842944	0.665786	1.06724	0.155796	0.809261	0.493035	1.32831	0.402563	1.05807	0.548737	2.04018	0.866185	0.858422	0.584979	1.25968	0.435298	1.46249	0.588434	3.63487	0.413151	0.863565	0.348013	2.14286	0.751745
2020	0.886995	0.701843	1.12099	0.315451	0.673503	0.40207	1.12818	0.133161	0.90686	0.463224	1.77537	0.775458	0.830261	0.5646	1.22092	0.344435	1.23828	0.490715	3.12468	0.650874	0.753737	0.300756	1.88897	0.546435
2021	0.748497	0.589028	0.951139	0.0177994	0.747371	0.454892	1.2279	0.25035	0.712194	0.356838	1.42143	0.335749	0.838264	0.573149	1.22601	0.363086	1.38735	0.560148	3.43611	0.479247	0.620289	0.24432	1.57481	0.315076
2022	0.798788	0.625557	1.01999	0.0716613	0.715637	0.426698	1.20023	0.204735	0.598632	0.286511	1.25077	0.172319	0.729555	0.489533	1.08726	0.121386	1.26999	0.502733	3.20819	0.613212	0.590333	0.225884	1.5428	0.282227
Age	1.01014	1.00085	1.01951	0.0322988	1.01028	0.990425	1.03053	0.312595	1.00916	0.983833	1.03515	0.481839	0.997773	0.983821	1.01192	0.756331	1.00344	0.975531	1.03214	0.81163	0.999935	0.967562	1.03339	0.996901
pPROM*2	0.861191	0.742979	0.99821	0.047284	0.906336	0.671002	1.22421	0.521426	0.744088	0.49008	1.12975	0.165326	0.9087	0.752571	1.09722	0.319551	0.937619	0.660173	1.33167	0.718973	0.762542	0.484915	1.19912	0.240493
CCI	1.60107	1.28903	1.98865	2.08694e-05	2.24103	1.50796	3.33049	0.000397933	1.36626	0.740909	2.51942	0.317545	1.48685	1.0594	2.08676	0.0218117	1.80424	0.996846	3.26557	0.0512324	1.61037	0.779011	3.32896	0.198458
Hypertensive disorder of pregnency	1.85864	1.58753	2.17604	8.01043e-12	2.17478	1.59225	2.97042	0.000397933	3.79827	2.73419	5.27646	9.9063e-13	1.95401	1.52559	2.50274	9.9063e-13	1.70834	1.06855	2.73122	0.0252933	2.77823	1.75559	4.39656	0.000397933
Gestational age	1.00422	0.992655	1.01591	0.476284	0.99491	0.970331	1.02011	0.689266	0.981642	0.949728	1.01463	0.271885	0.999431	0.980566	1.01866	0.000123973	0.965306	0.929168	1.00285	0.0697137	1.01052	0.964232	1.05902	0.661846
Multiple	0.887514	0.778445	1.01187	0.0744793	1.84992	1.46387	2.33777	3.23104e-07	3.81439	2.90289	5.0121	1.18714e-21	1.80745	1.50793	2.16647	0.953303	1.29315	0.894468	1.86953	0.171639	3.61356	2.51978	5.18212	3.23104e-07
Cesarean section	-	-	-	-	-	-	-	-	-	-	-	-	1.72619	1.45733	2.04466	1.77525e-15	5.2136	3.47115	7.83074	1.77525e-15	2.49076	1.6107	3.85168	4.0756e-05
1 Liver dysfunction, Arrhythmia,Heart failure,Pulmonary edema,Hypokalemia,Fetal arrhythmia,Rhabdomyolysis,Neutropenia
2 95% Confidence interval,
Dependent variables: Listed adverse events, Heart failure, and Pulmonary oedema
Covariate: (Model1) antenatal corticosteroid administration, ritodrine infusion duration magnesium sulphate hydrate, body mass index, fiscal year, age, preterm premature rupture of membranes, Charlson Comorbidity Index, hypertensive disorder of pregnancy, gestational age, and multiple pregnancies.
(Model2) Model 2 was further adjusted for the mode of delivery (caesarean section) in addition to the covariates used in Model 1.
