# Supplementary material
Source: Research Square preprint supplement (doi:10.21203/rs.3.rs-8892829/v1)
Supplement: Supplementary file 2 [file efce96bbbdef8d3dbf703ebf.xlsx]

## Sheet: Add3
Additional File 3
a. Incidence of Heart Failure Stratified by Antenatal Corticosteroids (ACS) and Mode of Delivery
		Heart Failure
		Yes, n (%)	No, n (%)	Total
Vaginal Delivery	ACS	19 (0.21)	8895 (99.71)	8914
(n=26780)	non-ACS	18 (0.10)	17848 (99.90)	17866
Caesarean Section	ACS	122 (1.02)	11834 (98.98)	11956
(n=17044)	non-ACS	43 (0.85)	5045 (99.15)	5088
This stratified analysis was performed to evaluate the potential confounding effect of the mode of delivery on the association between ACS and heart failure.
b. Incidence of Listed advers evevts Stratified by Antenatal Corticosteroids (ACS) and Mode of Delivery
		Listed advers evevts
		Yes, n (%)	No, n (%)	Total
Vaginal Delivery	ACS	130 (1.46)	8783 (98.53)	8914
(n=26780)	non-ACS	172 (0.96)	17694 (99.04)	17866
Caesarean Section	ACS	332 (2.78)	11624 (97.22)	11956
(n=17044)	non-ACS	127 (2.50)	4961 (97.50)	5088
This stratified analysis was performed to evaluate the potential confounding effect of the mode of delivery on the association between ACS and Listed advers evevts.
c. Incidence of Oedema Stratified by Antenatal Corticosteroids (ACS) and Mode of Delivery
		Pulmonary Oedema
		Yes, n (%)	No, n (%)	Total
Vaginal Delivery	ACS	21 (0.24)	8893 (99.76)	8914
(n=26780)	non-ACS	12 (0.07)	17854 (99.93)	17866
Caesarean Section	ACS	94 (0.79)	11862 (99.21)	11956
(n=17044)	non-ACS	23 (0.45)	5065 (99.15)	5088
This stratified analysis was performed to evaluate the potential confounding effect of the mode of delivery on the association between ACS and Pulmonary Oedema.
